# Supplementary material
Source: PubMed Central journal article supplement (PMC365760)
Supplement: pnas_101_9_3160__2.pdf [file pnas_101_9_3160__2.pdf]

| Species                                       | Gen. size | Total # ORFs | % ORFs in COGs | Normalize | Species                                 | Gen. size   | Total # ORFs | % ORFs in COGs            | Normalize       |
|-----------------------------------------------|-----------|--------------|----------------|-----------|-----------------------------------------|-------------|--------------|---------------------------|-----------------|
| <i>Aeropyrum_pernix</i>                       | 1.67      | 1840         | 66.5           | Solid     | <i>Mycoplasma_penetrans</i>             | 1.36        | 1037         | 44.7                      | Open            |
| <i>Agrobacterium_tumefaciens</i>              | 5.6       | 5299         | 80.7           | Solid     | <i>Mycoplasma_pneumoniae</i>            | 0.81        | 689          | 60.5                      | Solid           |
| <i>Agrobacterium_tumefaciens_UWash</i>        | 5.6       | 5402         | 78.9           | Solid     | <i>Mycoplasma_pulmonis</i>              | 0.96        | 782          | 63.8                      | Solid           |
| <i>Aquifex_aeolicus</i>                       | 1.6       | 1560         | 84.2           | Open      | <i>Neisseria_meningitidis_MC58</i>      | 2.27        | 2079         | 73.7                      | Solid           |
| <i>Archaeoglobus_fulgidus</i>                 | 2.18      | 2420         | 78.3           | Solid     | <i>Neisseria_meningitidis_Z2491</i>     | 2.18        | 2065         | 70.0                      | Solid           |
| <i>Bacillus_anthraxis</i>                     | 5.1       | 5311         | 57.1           | Open      | <i>Nitrosomonas_europaea</i>            | 2.81        | 2461         | 66.8                      | Solid           |
| <i>Bacillus_cereus</i>                        | 5.41      | 5255         | 59.1           | Solid     | <i>Nostoc_sp.</i>                       | 7.2         | 6129         | 58.2                      | Open            |
| <i>Bacillus_halodurans</i>                    | 4.2       | 4066         | 75.6           | Solid     | <i>Oceanobacillus_ihayensis</i>         | 3.63        | 3496         | 69.5                      | Solid           |
| <i>Bacillus_subtilis</i>                      | 4.2       | 4112         | 73.8           | Solid     | <i>Pasteurella_multocida</i>            | 2.4         | 2015         | 89.2                      | Open            |
| <i>Bacteroides_thetaiotaomicron</i>           | 6.26      | 4778         | 33.5           | Open      | <i>Pseudomonas_aeruginosa</i>           | 6.3         | 5567         | 80.8                      | Solid           |
| <i>Bifidobacterium_longum</i>                 | 2.26      | 1729         | 56.9           | Open      | <i>Pseudomonas_syringae</i>             | 6.4         | 5471         | 71.5                      | Solid           |
| <i>Borrelia_burgdorferi</i>                   | 0.9       | 1638         | 42.8           | Open      | <i>Pseudomonas_putida</i>               | 6.18        | 5350         | 68.7                      | Solid           |
| <i>Bradyrhizobium_japonicum</i>               | 9.11      | 8317         | 60.4           | Solid     | <i>Pyrobaculum_aerophilum</i>           | 2.2         | 2605         | 58.1                      | Open            |
| <i>Brucella_melitensis</i>                    | 3.3       | 3198         | 82.1           | Open      | <i>Pyrococcus_abyssi</i>                | 1.76        | 1769         | 83.7                      | Open            |
| <i>Brucella_suis</i>                          | 3.28      | 3264         | 73.1           | Solid     | <i>Pyrococcus_furiosus</i>              | 1.9         | 2065         | 75.7                      | Solid           |
| <i>Buchnera_aphidicola</i>                    | 0.62      | 504          | 95.4           | Open      | <i>Pyrococcus_horikoshii</i>            | 1.8         | 1801         | 77.6                      | Solid           |
| <i>Buchnera_sp.</i>                           | 0.71      | 574          | 96.5           | Open      | <i>Ralstonia_solanacearum</i>           | 5.8         | 5116         | 75.0                      | Solid           |
| <i>Campylobacter_jejuni</i>                   | 1.64      | 1634         | 78.6           | Solid     | <i>Rickettsia_conorii</i>               | 1.27        | 1374         | 65.8                      | Solid           |
| <i>Caulobacter_crescentus</i>                 | 4.01      | 3737         | 77.1           | Solid     | <i>Rickettsia_prowazekii</i>            | 1.1         | 835          | 84.9                      | Open            |
| <i>Chlamydia_muridarum</i>                    | 1.07      | 916          | 67.6           | Solid     | <i>S.enterica_ser_Typhi</i>             | 4.8         | 4767         | 71.8                      | Solid           |
| <i>Chlamydia_trachomatis</i>                  | 1.05      | 895          | 69.6           | Solid     | <i>Salmonella_typhimurium_LT2</i>       | 4.95        | 4553         | 79.7                      | Solid           |
| <i>Chlamydomydia_caviae</i>                   | 1.17      | 1005         | 63.5           | Solid     | <i>Shewanella_oneidensis</i>            | 5.03        | 4472         | 62.1                      | Solid           |
| <i>Chlamydomydia_pneumoniae_AR39</i>          | 1.23      | 1112         | 57.8           | Open      | <i>Shigella_flexneri</i>                | 4.61        | 4180         | 83.2                      | Open            |
| <i>Chlamydomydia_pneumoniae_CWL029</i>        | 1.23      | 1054         | 61.4           | Solid     | <i>Sinorhizobium_meliloti</i>           | 6.7         | 6205         | 81.7                      | Open            |
| <i>Chlamydomydia_pneumoniae_J138</i>          | 1.22      | 1069         | 60.7           | Solid     | <i>Staphylococcus_aureus_Mu50</i>       | 2.9         | 2748         | 73.6                      | Solid           |
| <i>Chlorobium_tepidum</i>                     | 2.16      | 2252         | 52.2           | Open      | <i>Staphylococcus_aureus_MW2</i>        | 2.8         | 2632         | 73.7                      | Solid           |
| <i>Clostridium_acetobutylicum</i>             | 4.1       | 3848         | 72.6           | Solid     | <i>Staphylococcus_aureus_N315</i>       | 2.81        | 2625         | 77.1                      | Solid           |
| <i>Clostridium_perfringens</i>                | 3.1       | 2723         | 64.2           | Solid     | <i>Staphylococcus_epidermidis</i>       | 2.5         | 2419         | 74.5                      | Solid           |
| <i>Clostridium_tetani</i>                     | 2.8       | 2373         | 67.4           | Solid     | <i>Streptococcus_agalactiae</i>         | 2.2         | 2124         | 69.7                      | Solid           |
| <i>Corynebacterium_efficiens</i>              | 3.15      | 2950         | 64.3           | Solid     | <i>Streptococcus_mutans</i>             | 2.04        | 1960         | 71.9                      | Solid           |
| <i>Corynebacterium_glutamicum</i>             | 3.3       | 3040         | 69.5           | Solid     | <i>Streptococcus_pneumoniae_R6</i>      | 2.03        | 2043         | 78.8                      | Solid           |
| <i>Coxiella_bruneti</i>                       | 2         | 2009         | 51.6           | Open      | <i>Streptococcus_pneumoniae_TIGR4</i>   | 2.2         | 2094         | 74.0                      | Solid           |
| <i>Deinococcus_radiodurans</i>                | 3.28      | 3182         | 70.2           | Solid     | <i>Streptococcus_pyogenes</i>           | 1.85        | 1697         | 77.7                      | Solid           |
| <i>Enterococcus_faecalis</i>                  | 3.35      | 3113         | 59.9           | Solid     | <i>Streptococcus_pyogenes_MGAS8232</i>  | 1.9         | 1845         | 72.2                      | Solid           |
| <i>Escherichia_coli_K12</i>                   | 4.6       | 4279         | 82.7           | Open      | <i>Streptomyces_avermitilis</i>         | 9.03        | 7575         | 48.8                      | Open            |
| <i>Escherichia_coli_O157:H7</i>               | 5.5       | 5361         | 73.2           | Solid     | <i>Streptomyces_coelicolor</i>          | 8.67        | 7512         | 48.3                      | Open            |
| <i>Escherichia_coli_O157:H7_EDL933</i>        | 5.6       | 5324         | 74.2           | Solid     | <i>Sulfolobus_solfataricus</i>          | 2.99        | 2977         | 73.4                      | Solid           |
| <i>Escherichia_coli_CFT</i>                   | 5.23      | 5379         | 69.0           | Solid     | <i>Sulfolobus_tokodaii</i>              | 2.7         | 2826         | 60.4                      | Solid           |
| <i>Fusobacterium_nucleatum</i>                | 2.17      | 2067         | 73.8           | Solid     | <i>Synechocystis_sp._PCC_6803</i>       | 3.57        | 3167         | 70.2                      | Solid           |
| <i>Haemophilus_influenzae</i>                 | 1.83      | 1714         | 91.8           | Open      | <i>Thermoanaerobacter_tengcongensis</i> | 2.7         | 2588         | 64.8                      | Solid           |
| <i>Halobacterium_sp._NRC-1</i>                | 2.57      | 2622         | 67.3           | Solid     | <i>Thermoplasma_acidophilum</i>         | 1.56        | 1482         | 83.5                      | Open            |
| <i>Helicobacter_pylori_26695</i>              | 1.66      | 1576         | 69.9           | Solid     | <i>Thermoplasma_volcanium</i>           | 1.58        | 1499         | 83.7                      | Open            |
| <i>Helicobacter_pylori_J99</i>                | 1.64      | 1491         | 71.9           | Solid     | <i>Thermosynechococcus_elongatus</i>    | 2.6         | 2475         | 65.0                      | Solid           |
| <i>Lactobacillus_plantarum</i>                | 3.31      | 3009         | 63.5           | Solid     | <i>Thermotoga_maritima</i>              | 1.85        | 1858         | 82.0                      | Open            |
| <i>Lactococcus_lactis</i>                     | 2.36      | 2267         | 77.6           | Solid     | <i>Treponema_pallidum</i>               | 1.14        | 1036         | 69.4                      | Solid           |
| <i>Leptospira_interrogans</i>                 | 4.69      | 4727         | 27.7           | Open      | <i>Tropheryma_whipplei</i>              | 0.93        | 783          | 63.5                      | Solid           |
| <i>Listeria_innocua</i>                       | 3.01      | 3043         | 77.6           | Solid     | <i>Ureaplasma_urealyticum</i>           | 0.75        | 614          | 66.6                      | Solid           |
| <i>Listeria_monocytogenes</i>                 | 2.94      | 2846         | 79.7           | Solid     | <i>Vibrio_cholerae</i>                  | 4           | 3835         | 73.0                      | Solid           |
| <i>Mesorhizobium_lotii</i>                    | 7.59      | 7275         | 75.7           | Solid     | <i>Vibrio_paraahaemolyticus</i>         | 5.18        | 4537         | 68.8                      | Solid           |
| <i>Methanococcus_jannaschii</i>               | 1.74      | 1785         | 79.2           | Solid     | <i>Vibrio_vulnificus</i>                | 5.13        | 4832         | 64.2                      | Solid           |
| <i>Methanopyrus_kandleri_AV19</i>             | 1.7       | 1687         | 72.6           | Solid     | <i>Wigglesworthia_brevipalpis</i>       | 0.7         | 654          | 89.3                      | Open            |
| <i>Methanosarcina_acetivorans</i>             | 5.75      | 4540         | 67.3           | Solid     | <i>Xanthomonas_campestris</i>           | 5.08        | 4181         | 65.9                      | Solid           |
| <i>Methanosarcina_mazei</i>                   | 4.1       | 3371         | 68.4           | Solid     | <i>Xanthomonas_pv_citri</i>             | 5.17        | 4312         | 63.9                      | Solid           |
| <i>Methanothermobacter_thermautotrophicus</i> | 1.75      | 1873         | 77.7           | Solid     | <i>Xylella_fastidiosa</i>               | 2.68        | 2832         | 60.0                      | Solid           |
| <i>Mycobacterium_leprae</i>                   | 3.26      | 1605         | 70.5           | Solid     | <i>Xylella_fastidiosa_pv_temecula</i>   | 2.52        | 2036         | 74.5                      | Solid           |
| <i>Mycobacterium_tuberculosis_CDC1551</i>     | 4.4       | 4187         | 63.7           | Solid     | <i>Yersinia_pestis</i>                  | 4.65        | 4083         | 79.8                      | Solid           |
| <i>Mycobacterium_tuberculosis_H37Rv</i>       | 4.4       | 3927         | 70.1           | Solid     | <i>Yersinia_pestis_pv_kim</i>           | 4.6         | 4090         | 77.3                      | Solid           |
| <i>Mycoplasma_genitalium</i>                  | 0.58      | 484          | 77.9           | Solid     | <b>AVERAGE</b>                          | <b>3.24</b> | <b>2987</b>  | <b>70.3 (STDEV: 11.2)</b> | <b>87 Solid</b> |
