# Supplementary material
Source: PubMed Central journal article supplement (PMC365760)

## Panel B: Cellular processes categories

V: Defense mechanisms

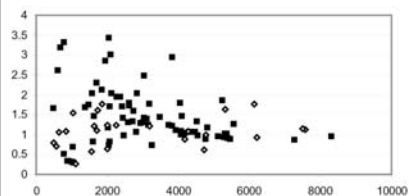

M: Cell membrane-envelope biogenesis

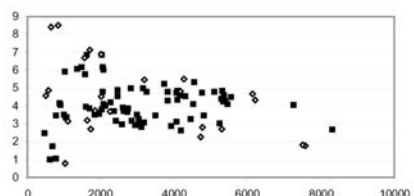

U: Intracellular trafficking, secretion

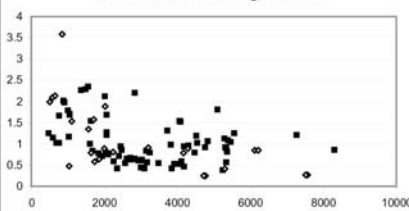

O: Posttranslational modification, protein turnover

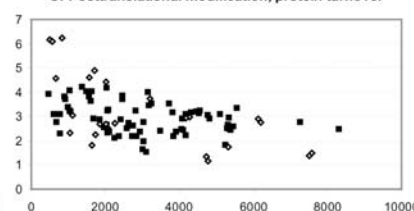

## Panel C: Metabolism categories

G: Carbohydrate transport and metabolism

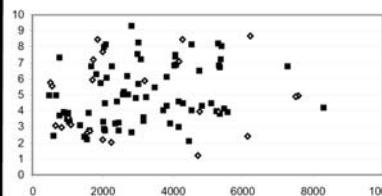

E: Amino acid transport and metabolism

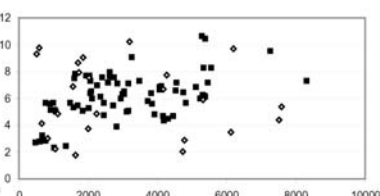

H: Coenzyme metabolism

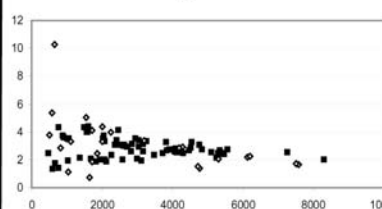

P: Inorganic ion transport and metabolism

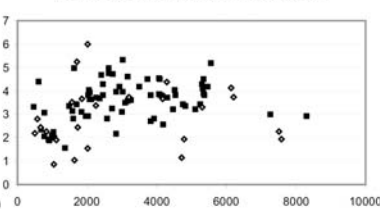

## Panel D: Poorly characterized

R: General prediction only

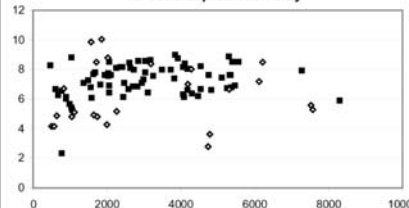

S: Function unknown

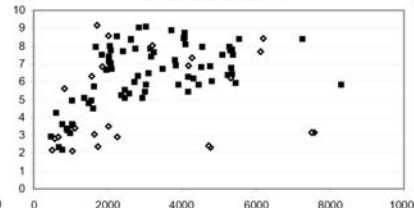

I: Lipid metabolism

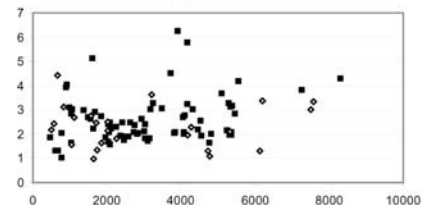

Supplement: pnas_101_9_3160__4.pdf [file pnas_101_9_3160__4.pdf]
