# Supplementary material
Source: PubMed Central journal article supplement (PMC365760)

## KEGG Data

### Translation

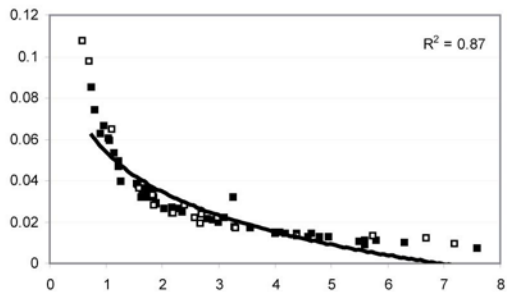

## TIGR Data

### Proteins synthesis (translation)

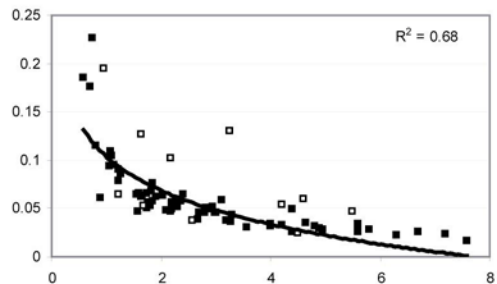

### Signal Transduction

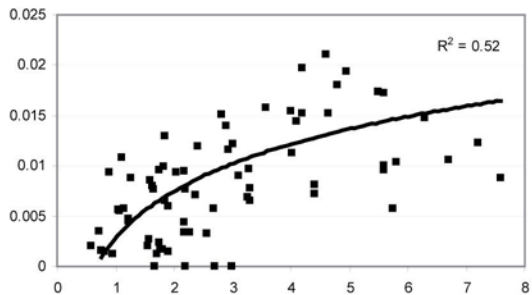

### Regulatory proteins

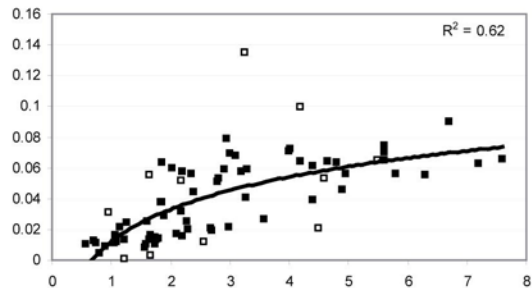

Supplement: pnas_101_9_3160__6.pdf [file pnas_101_9_3160__6.pdf]
